# Dialysis modality choice in diabetic patients with end-stage kidney disease: a systematic review of the available evidence

Cecile Couchoud<sup>1</sup>, Davide Bolignano<sup>2,3</sup>, Ionut Nistor<sup>4</sup>, Kitty J. Jager<sup>5</sup>, James Heaf<sup>6</sup>, Olle Heimbürger<sup>7</sup> and Wim Van Biesen<sup>8</sup> on behalf of the European Renal Best Practice (ERBP) Diabetes Guideline Development Group

<sup>1</sup>REIN registry, Agence de la biomédecine, Saint-Denis La Plaine, France, <sup>2</sup>CNR-Institute of Clinical Physiology, Reggio Calabria, Italy, <sup>3</sup>ERBP, Ghent University Hospital, Ghent, Belgium, <sup>4</sup>Nephrology Department, Gr. T. Popa University of Medicine and Pharmacy, Iasi, Romania, <sup>5</sup>ERA-EDTA Registry, Department of Medical Informatics, Academic Medical Center, University of Amsterdam, Amsterdam, The Netherlands, <sup>6</sup>Department of Nephrology B, Copenhagen University hospital at Herlev, Herlev, Denmark, <sup>7</sup>Division of Renal Medicine, Department of Clinical Science, Karolinska Institutet, Huddinge University Hospital, Stockholm, Sweden and <sup>8</sup>Chair of ERBP, Renal Division, Ghent University Hospital, Ghent, Belgium

Correspondence and offprint requests to: Cécile Couchoud; E-mail: cecile.couchoud@biomedecine.fr

## ABSTRACT

**Background.** Diabetes is the leading cause of end-stage kidney disease (ESKD). Because of conflicting results in observational studies, it is still subject to debate whether in diabetic patients the dialysis modality selected as first treatment (haemodialysis or peritoneal dialysis) may have a major impact on outcomes. We therefore aimed at performing a systematic review of the available evidence.

**Methods.** MEDLINE, EMBASE and CENTRAL databases were searched until February 2014 for English-language articles without time or methodology restrictions by highly sensitive search strategies focused on diabetes, end-stage kidney disease and dialysis modality. Selection of relevant studies, data extraction and analysis were performed by two independent reviewers.

**Results.** Twenty-five observational studies (23 on incident and 2 on prevalent cohorts) were included in this review. Mortality was the only main outcome addressed in large cohorts. When considering patient survival, results were inconsistent and varied across study designs, follow-up period and subgroups. We therefore found no evidence-based arguments in favour or against a particular dialysis modality as first choice treatment in patients with diabetes and ESKD. However, peritoneal dialysis (PD) as first choice seems to convey a higher risk of death in elderly and frail patients.

**Conclusions.** The available evidence derived from observational studies is inconsistent. Therefore evidence-based arguments indicating that HD or PD as first treatment may improve patient-centred outcomes in diabetics with ESKD are lacking. In the

absence of such evidence, modality selection should be governed by patient preference, after unbiased patient information.

**Keywords:** diabetes, epidemiology, haemodialysis, peritoneal dialysis, systematic review

## INTRODUCTION

Diabetes has become the most common cause of end-stage kidney disease (ESKD) in most countries, with still increasing incidence, while incidence rates of ESKD from other causes seem to have stabilized [1, 2].

The question on optimal choice of dialysis modality, whether it be peritoneal dialysis (PD) or haemodialysis (HD), remains a matter of debate, especially in diabetic patients with ESKD [3–5]. Modality choice might have some peculiar aspects in diabetics with advanced chronic kidney disease (CKD). There is the fear that constant exposure to glucose in the dialysate may further worsen glycaemic control in diabetic patients when on peritoneal dialysis. On the contrary, PD therapy may be better tolerated than HD because of a more stable blood pressure in diabetic patients, e.g. with autonomic neuropathy. Also, creation of a good vascular access in the presence of advanced calcific atherosclerosis might be challenging [3].

Randomized controlled trials comparing PD and HD [6] have been proven to be very difficult due to recruitment problems. Because of conflicting results in observational studies [7–9], it is still unclear whether in diabetic CKD patients one dialysis modality should be preferred over another as a first line

approach because of a substantial difference in major outcomes. Currently, there is great heterogeneity in practice concerning the information given to the patients and the choice of first modality of treatment [10]. A US survey among nephrologists has shown that people with diabetes had half the odds of being recommended for PD [11]. On the other hand, a similar survey among Canadian, British Isles and American nephrologists showed that diabetes operates slightly to favour PD [12–14].

The European Renal Best Practice (ERBP) Diabetes guideline development group therefore aimed at performing a systematic review of the available evidence in order to establish whether in diabetic patients the choice of the first dialysis modality may impact on their clinical outcomes.

## MATERIALS AND METHODS

### Data source and search strategy

MEDLINE, EMBASE and CENTRAL databases were searched until February 2014 for English-language articles without time or methodology restrictions through focused and highly sensitive search strategies (Supplementary Table S1). Supplementary articles were added by manual search.

### Study selection

We planned to include any randomized or non-randomized controlled trial, single-arm, prospective or retrospective observational study comparing any kind of peritoneal dialysis (automated peritoneal dialysis APD, continuous ambulatory peritoneal dialysis CAPD) to any kind of haemodialysis (conventional HD, haemofiltration HF, haemodiafiltration HDF, daily HD) as first renal replacement therapy in diabetic patients with ESKD. Studies were considered without follow-up duration restrictions. Diabetes (type I or II) was considered either as being the cause of ESKD or a superimposed condition. Studies where a well-defined part of the population fulfilled the above criteria were included in the review. Outcomes of interest were survival, quality of life, major morbid events (including but not limited to myocardial infarction, stroke, amputation and loss of vision), hospital admissions, deterioration of residual renal function when already on dialysis, minor morbid events (including but not limited to hypoglycaemia, delayed wound healing, infection, visual disturbances and pain), functional status, glycaemic control, access to transplantation and technique survival. Studies were excluded if: (i) outcomes were not reported for diabetics separately; (ii) not providing longitudinal data on any of the above mentioned outcomes; (iii) not directly comparing HD with PD. Case reports, reviews, editorials and letters were excluded as well, although they were screened as potential sources of additional references. Selection of relevant studies was independently performed by two authors (C.C. and D.B.). Discrepancies were solved collegially.

### Quality assessment

We used the Newcastle–Ottawa Scale [15] to assess the study quality for observational studies. This scale considers a quality score calculated on the basis of three major issues: study

participants (0–4 points), adjustment for confounding (0–2 points) or ascertainment of the exposure or outcome of interest (0–3 points) with a maximum score of 9 points which represents the highest methodological quality.

### Data extraction and analysis

Data extraction and analysis were performed by two reviewers independently (C.C. and D.B.). In studies considering mixed populations, the subgroup of patients with documented diabetes was described only if corresponding data were available.

## RESULTS

### Search results and study selection

Four hundred and twenty-three records were identified through database searches. In addition, three more studies were found through additional sources. Among them, 76 full-text articles were assessed for eligibility. Fifty-one full-text articles were excluded: 19 because of an inappropriate study population, 15 because of the absence of the comparator or an inappropriate intervention and 17 for other causes, mainly because of a lack in reporting of outcomes for diabetic patients separately. Figure 1 provides a flow diagram of the study selection process.

### Study characteristics

Among the 25 studies included, there were no randomized controlled trials, 23 were cohort studies in incident patients (registries, historical prospective cohorts, retrospective cohorts) and 2 studies in prevalent patients [16, 17]. Eight studies started inclusion before 1995 [7, 18–24], 7 studies between 1995 and 2000 [8, 25–31] and 7 after 2000 [32–38]. The details of the 23 studies that included incident patients are summarized in Table 1. The total number of patients included in the 23 incident cohort studies was 1 008 453, ranging from 181 [31] to 398 940 [27]. None included only diabetic patients; the percentage of diabetic patients ranged from 9 [26] to 61% [38]. The total number of diabetic patients included was 721 783 on HD and 106 790 on PD. In those studies, no treatment details were available allowing us to analyse the benefit from haemodiafiltration or automated PD for example. Eleven cohort studies reported on North American patients, 8 on European patients, 3 from Asia and 1 from South America. Three studies were based on the CMS form for ESKD patients in the USA with overlapping periods [27, 29, 30]. The two retrospective cohort studies that included United States Renal Data System (USRDS) prevalent patients ended their inclusion more than 15 years ago and did not give the number of diabetic patients according to their dialysis modality [16, 17].

### Risk of bias

The overall study quality assessed by the Newcastle–Ottawa scale was moderate to high (range 5–9). The details are given in Table 2.

Because of their observational design, none of the included studies was free from selection bias. Furthermore, since none

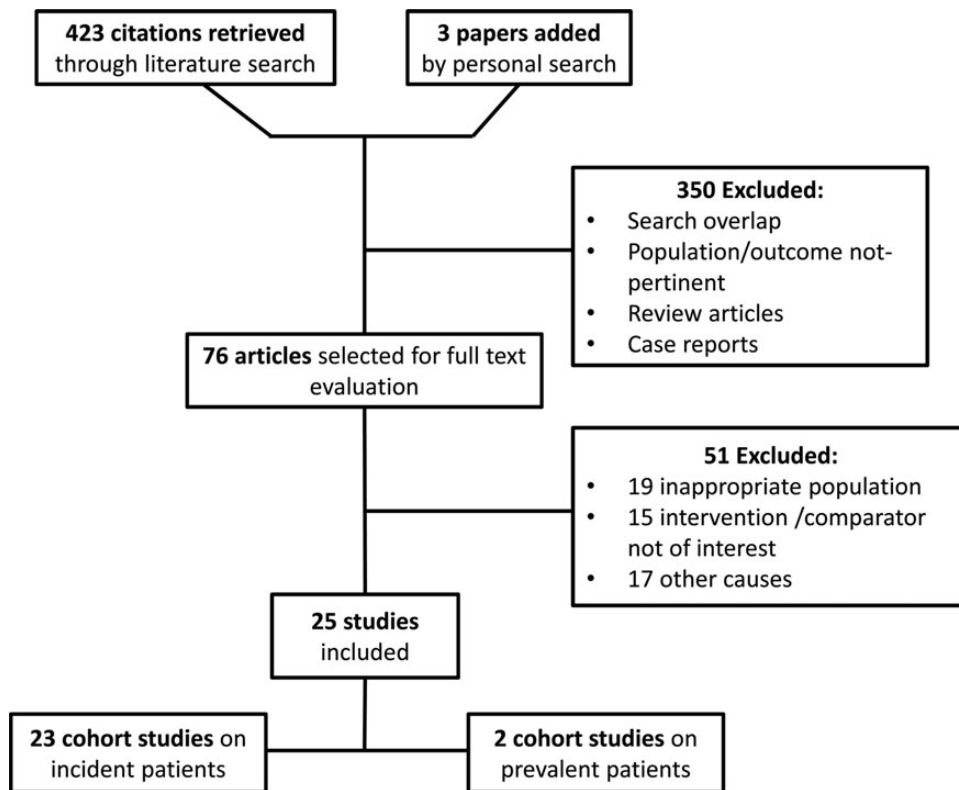

FIGURE 1: Flow chart of the study selection process.

included only diabetic patients, only few details were available, on for example the case mix of the diabetic patients according to their modality of treatment.

There was some heterogeneity in the length of follow-up among studies (from 1 to 8 years) which may hamper the generalizability of results. Because many studies have shown a non-proportional hazard, the risk over time was evaluated using various methods. Five studies used a Poisson regression model which allowed them to take into account person-time [21, 22, 24, 27, 31], eight used a non-proportional hazards (Cox) model stratified on time [19, 20, 22, 23, 25, 28–30] and one used a marginal structural model stratified on time [38].

### Outcomes

None of the reviewed studies provided data on quality of life, patient satisfaction, major and minor morbid events, hospital admissions, deterioration of residual renal function, functional status, glycaemic control, access to transplantation or survival of the technique. Twenty-four cohort studies analysed the risk of death. Only one cohort study considered the risk of infectious complications [31].

### First dialysis modality and mortality

Supplementary Table S2 shows the association of PD with mortality in incident diabetic patients within the 23 cohort studies.

In intention-to-treat analyses (i.e. patients are assigned to their initial treatment and not to the treatment eventually received), the results were as follows.

Statistically significant difference in favour of PD (highlighted in red in Supplementary Table S2) was observed in patients aged 40–50 years before 15 months after the start of dialysis [19], in patients aged 18–44 years without other comorbidities during the first 3 years [27], in patients under 60 years in the first 2 years [25], in the first 12 months [34], 9 months [38] or 6 months [23].

Statistically significant difference in favour of HD (highlighted in green in Supplementary Table S2) was observed in patients aged over 50 years after 15 months [19], in all the patients [39], in patients with or without CAD after 6 months [29, 30], in patients with congestive heart failure (CHF) [29], in patients without CHF after 6 months [29], in patients over 45 years [27], in patients over 67 years [22], in patients over 65 years after 6 months [20], in elderly women over 70 years [8], after 1 year when starting at Day 90, and in patients under 60 years [36], in patients aged 18–60 years [36], in all the subgroups over 45 years [24].

No statistically significant difference was observed in all patients [7, 18, 21, 26, 32, 35], in men or women under 70 years [8], in elderly patients over 75 [33], in patients under 40 years after 15 months or 60–70 years before 15 months [19], in patients 18–44 years with comorbidities [27], in all patients during the first 2 years [28], in patients <60 years or patients over 60 years in the first 2 years [25], in patients over 65 years before 6 months [20], in patients over 60 years [36], in all the patients after 6 months [23], in patients aged 18–44 years [24].

In as-treated analyses (i.e. patients are considered at risk as long they are treated in the modality), a statistical difference in favour of PD was observed in all patients [7], only in patients under 60 years during the first 2 years [25], patients under 65

Table 1. Characteristics of the included studies

| Author [ref]                   | Publication year | Study design               | Location      | Start of study (year) | End of study (year) | Type of data                        | Name of the database           | Patient characteristics inclusion                                                                          | Patient characteristics exclusion                                                                                                                                                                         | Total number of patients included (with or without diabetes) | % patients with diabetes or diabetic nephropathy | Haemodialysis patients with diabetes | Peritoneal patients with diabetes |
|--------------------------------|------------------|----------------------------|---------------|-----------------------|---------------------|-------------------------------------|--------------------------------|------------------------------------------------------------------------------------------------------------|-----------------------------------------------------------------------------------------------------------------------------------------------------------------------------------------------------------|--------------------------------------------------------------|--------------------------------------------------|--------------------------------------|-----------------------------------|
| Data from of incident patients |                  |                            |               |                       |                     |                                     |                                |                                                                                                            |                                                                                                                                                                                                           |                                                              |                                                  |                                      |                                   |
| Aslam [31]                     | 2006             | Prospective cohort study   | North America | 1999                  | 2005                | Cohort                              | Oakland dialysis centre        | All incident dialysis patients at a single centre                                                          |                                                                                                                                                                                                           | 181                                                          | 51%                                              | 119                                  | 62                                |
| Chang [37]                     | 2013             | Retrospective cohort study | Korea         | 2000                  | 2009                | Cohort                              | Gachon University Gil hospital | All incident adult dialysis patients at Day 90                                                             | Pre-emptive transplantation, missing data                                                                                                                                                                 | 836                                                          | 54%                                              | 321                                  | 128                               |
| Choi [35]                      | 2013             | Prospective cohort study   | Korea         | 2008                  | 2011                | Registry                            | CRC for ESRD                   | all incident patients over 20 years, with dialysis for more than 3 months                                  | Kidney transplantation within the first 3 months                                                                                                                                                          | 1060                                                         | 48%                                              | 367                                  | 145                               |
| Collins [22]                   | 2002             | Prospective cohort study   | USA           | 1989                  | 1993                | Registry                            | Medicare USRDS                 | All incident patients aged 67 years and over                                                               | Less than 60 days in one modality and missing data for gender, race, renal network of residence, primary cause of renal failure                                                                           | 89 193                                                       | 41%                                              | 63 513                               | 6695                              |
| Couchoud [33]                  | 2007             | Prospective cohort study   | France        | 2002                  | 2005                | Registry                            | REIN                           | All incident dialysis patients aged 75 years and over                                                      |                                                                                                                                                                                                           | 3512                                                         | 36%                                              | 2880                                 | 632                               |
| Fenton [21]                    | 1997             | Prospective cohort study   | Canada        | 1990                  | 1994                | Registry                            | CORR                           | All incident patients                                                                                      | Missing data on comorbidity                                                                                                                                                                               | 10 633                                                       | 25%                                              | 1800                                 | 907                               |
| Ganesh [30]                    | 2003             | Prospective cohort study   | USA           | 1995                  | 1997                | Registry                            | CMS ESRD                       | All new ESRD adult patients at Day 90                                                                      | Age less than 18 and missing data on age, gender, race, indicators of CAD, no modality assignment at Day 90                                                                                               | 107 922                                                      | 44%                                              | 93 900                               | 14 022                            |
| Heaf [7]                       | 2002             | Prospective cohort study   | Danemark      | 1990                  | 1999                | Registry                            | DNR                            | All incident dialysis patients                                                                             |                                                                                                                                                                                                           | 4921                                                         | 19%                                              | 4020                                 | 2208                              |
| Heaf [23]                      | 2014             | Prospective cohort study   | Danemark      | 1990                  | 2010                | Registry                            | DNR                            | All incident dialysis patients                                                                             | Pre-emptive transplantation                                                                                                                                                                               | 12 095                                                       | 23%                                              | 1822                                 | 916                               |
| Jaar [28]                      | 2005             | Prospective cohort study   | USA           | 1995                  | 1998                | Cohort                              | CHOICE                         | All incident English or Spanish speakers dialysis patients aged >17 years. Population of the CHOICE study. |                                                                                                                                                                                                           | 1041                                                         | 54%                                              | 764                                  | 274                               |
| Lee [18]                       | 2009             | Prospective cohort study   | Taiwan        | 1991                  | 2005                | Cohort                              | Chang Gung Memorial hospital   | All incident dialysis patients with dialysis for more than 3 months                                        | Severe comorbidities: malignancy, COPD, decompensated cirrhosis, class IV heart failure, vegetative life.                                                                                                 | 1347                                                         | 38%                                              | 1089                                 | 258                               |
| Liem [19]                      | 2007             | Prospective cohort study   | Netherlands   | 1987                  | 2002                | Registry                            | RENINE                         | All incident dialysis patients                                                                             | Age <18 years, dialysis vintage <30 days, death within first 90 days of RRT, transplantation (pre-emptive) or renal function recover, and centres with fewer than 20 patients or fewer than 5 PD patients | 16 643                                                       | 15%                                              | 10 841                               | 5802                              |
| Lukowsky [38]                  | 2013             | Prospective cohort study   | USA           | 2001                  | 2006                | Dialysis chain data base + registry | Da Vita USRDS                  | All incident dialysis patients at Day 90                                                                   | No missing data                                                                                                                                                                                           | 23,718                                                       | 61%                                              | 13 885                               | 740                               |

Continued

Table 1. Continued

| Author [ref]                                     | Publication year | Study design               | Location      | Start of study (year) | End of study (year) | Type of data | Name of the database | Patient characteristics inclusion                                                                                                                    | Patient characteristics exclusion                                                                                                               | Total number of patients included (with or without diabetes) | % patients with diabetes or diabetic nephropathy | Haemodialysis patients with diabetes | Peritoneal patients with diabetes |
|--------------------------------------------------|------------------|----------------------------|---------------|-----------------------|---------------------|--------------|----------------------|------------------------------------------------------------------------------------------------------------------------------------------------------|-------------------------------------------------------------------------------------------------------------------------------------------------|--------------------------------------------------------------|--------------------------------------------------|--------------------------------------|-----------------------------------|
| Mircescu [26]                                    | 2006             | Retrospective cohort study | Romania       | 1995                  | 2002                | Registry     | RRR                  | All incident patients surviving at least 3 months after RRT initiation                                                                               |                                                                                                                                                 | 2284                                                         | 9%                                               | 1872                                 | 412                               |
| Mircescu [36]                                    | 2014             | Prospective cohort study   | Romania       | 2008                  | 2011                | Registry     | RRR                  | All adult incident patients surviving at least 3 months after RRT initiation                                                                         | Kidney transplantation or recovery of renal function within the first 3 months                                                                  | 9252                                                         | 15%                                              | 1246                                 | 194                               |
| Sanabria [32]                                    | 2008             | Retrospective cohort study | Colombia      | 2001                  | 2005                | Cohort       | DOC                  | All incident patients who reached the 90th day of therapy, over 18 years                                                                             | Missing data on comorbidity                                                                                                                     | 923                                                          | 41%                                              | 157                                  | 220                               |
| Stack [29]                                       | 2003             | Prospective cohort study   | USA           | 1995                  | 1997                | Registry     | CMS ESRD             | All incident patients age 18 years and older at Day 90                                                                                               | Renal transplant within 90 days, data missing for demographic, comorbid and laboratory variables and no treatment modality assignment at Day 90 | 158 685                                                      | 44%                                              | 93 900                               | 14 022                            |
| Termorshuizen [25]                               | 2003             | Prospective cohort study   | Netherlands   | ?                     | 2002                | Cohort       | NECOSAD              | All incident dialysis patients, age 18 years and older, informed consent, survived the first 3 months                                                |                                                                                                                                                 | 1222                                                         | 15%                                              | 742                                  | 480                               |
| van de Luitgaarden [8]                           | 2011             | Prospective cohort study   | Europe        | 1998                  | 2006                | Registry     | ERA EDTA             | All incident patients aged ≥20 years, start with dialysis                                                                                            | Missing data on comorbidity                                                                                                                     | 15 828                                                       | 31%                                              | 12 731                               | 3097                              |
| Vonesh [27]                                      | 2004             | Prospective cohort study   | USA           | 1995                  | 2000                | Registry     | CMS ESRD             | All incident patients who survived 90 days                                                                                                           |                                                                                                                                                 | 398 940                                                      | 45%                                              | 35 2706                              | 46 234                            |
| Weinhandl [34]                                   | 2009             | Retrospective cohort study | USA           | 2003                  | 2006                | Registry     | CMS ESRD             | All incident adult patients, over 18 years                                                                                                           | Missing data on age, sex, race or ethnicity                                                                                                     | 98 875                                                       | 46%                                              | 47 937                               | 3190                              |
| Winkelmayer [20]                                 | 2002             | Prospective cohort study   | USA           | 1991                  | 1996                | Registry     | CMS ESRD             | All patients aged >65 years, active participants in Medicare or Medicaid programs for at least 12 months, >2 months of survival after dialysis start | Renal transplantation in the first month of dialysis                                                                                            | 2503                                                         | 49%                                              | 1966                                 | 537                               |
| Yeates [24]                                      | 2012             | Prospective cohort study   | North America | 1991                  | 2007                | Registry     | CORR                 | All incident patients over 17 years                                                                                                                  | Pre-emptive transplantation                                                                                                                     | 46 839                                                       | 40%                                              | 13 205                               | 5615                              |
| Data from prevalent patients<br>Bloembergen [16] | 1995             | Retrospective cohort study | North America | 1987                  | 1989                | Registry     | USRDS                | Three national cohorts of prevalent patients receiving PD and centre HD, each with 365 days of follow-up.                                            | Follow-up less than 3 months and switch between treatment modalities 60 days before                                                             | 170 700 patients years                                       | 25%                                              | ?                                    | ?                                 |
| Mattana [17]                                     | 1997             | Retrospective cohort study | North America | 1989                  | 1991                | Registry     | USRDS                | All prevalent dialysis patients                                                                                                                      |                                                                                                                                                 | ?                                                            | ?                                                | ?                                    | ?                                 |

PD, peritoneal dialysis; RRT, renal replacement therapy; CMS, Centers for Medicare and Medicaid services; USRDS, United States Renal Data System; REIN, French Renal Epidemiology and Information Network; CRC for ESRD, Clinical Research Center for End Stage Renal Disease; CORR, Canadian Organ Replacement Register; ERA EDTA, European Renal Association – European Dialysis Transplantation Association; NECOSAD, The Netherlands Cooperative Study on Adequacy of Dialysis; DOC, Dialysis Outcomes in Colombia study; RRR, Romanian Renal Registry; Da Vita Inc, DaVita HealthCare Partners Inc. company; DNR, Danish Nephrology registry; CHOICE, Choices for Healthy Outcomes in Caring for ESRD study; RENINE, Dutch End-Stage Renal Disease Registry.

Table 2. Quality assessment of the included cohort studies

| Author      | Publication year | Newcastle–Ottawa scale |                         |                   | Potential financial interest | Methods                                                                       | Comments                                                                                                                                                                               |
|-------------|------------------|------------------------|-------------------------|-------------------|------------------------------|-------------------------------------------------------------------------------|----------------------------------------------------------------------------------------------------------------------------------------------------------------------------------------|
|             |                  | Selection (up to 4)    | Comparability (up to 2) | Outcome (up to 3) |                              |                                                                               |                                                                                                                                                                                        |
| Bloembergen | 1995             | 3                      | 1                       | 3                 | No                           | Adjusted death rates                                                          | Prevalent patients. Censoring at transplantation.                                                                                                                                      |
| Aslam       | 2006             | 3                      | 1                       | 3                 | Yes                          | Multivariate Poisson regression                                               | Low number of events. Censoring at treatment switch, at transplantation and at death.                                                                                                  |
| Chang       | 2013             | 3                      | 2                       | 1                 | No                           | Multivariate Cox proportional hazards model.                                  | Retrospective. Propensity score. Censoring at transplantation.                                                                                                                         |
| Choi        | 2013             | 4                      | 2                       | 3                 | No                           | Kaplan Meier curve on matched population                                      | Propensity score. Stratification on age and gender.                                                                                                                                    |
| Collins     | 2002             | 4                      | 1                       | 3                 | No                           | Multivariate Poisson regression                                               | Stratification on time. Censoring at transplantation and at treatment switch. Some death rates per 1000 patients years >1000?                                                          |
| Couchoud    | 2007             | 4                      | 2                       | 3                 | No                           | Multivariate Cox proportional hazards model.                                  | No stratification on time.                                                                                                                                                             |
| Fenton      | 1997             | 4                      | 2                       | 3                 | No                           | Multivariate Poisson regression + Multivariate Cox proportional hazards model | Various additional models                                                                                                                                                              |
| Ganesh      | 2003             | 4                      | 2                       | 2                 | Yes                          | Multivariate time-dependant Cox regression.                                   | Censoring at transplantation. Additional as-treat analysis. Stratification on time and coronary artery disease.                                                                        |
| Heaf        | 2002             | 4                      | 0                       | 3                 | No                           | Multivariate Cox proportional hazards model.                                  | Adjustment on comorbidities not clear. No stratification on time, stratification on age. Censoring at transplantation. Additional as-treat analysis and censoring at treatment switch. |
| Heaf        | 2014             | 4                      | 2                       | 3                 | No                           | Multivariate Cox proportional hazards model.                                  | Stratification on time, age and vintage. Censoring at transplantation.                                                                                                                 |
| Jaar        | 2005             | 4                      | 1                       | 2                 | Yes                          | Multivariate Cox proportional hazards model.                                  | Propensity score. Stratification on time. Censoring at transplantation. Additional as-treat analysis and censoring at treatment switch or switch analysed as treatment failure.        |
| Lee         | 2009             | 2                      | 1                       | 2                 | No                           | Multivariate Cox proportional hazards model.                                  | Censoring at transplantation and at treatment switch. No stratification on time.                                                                                                       |
| Liem        | 2007             | 4                      | 1                       | 3                 | Yes                          | Multivariate Cox proportional hazards model.                                  | Stratification on time and age. Censoring at transplantation.                                                                                                                          |
| Lukowsky    | 2013             | 3                      | 2                       | 3                 | Unclear                      | Marginal structural model                                                     | Inverse probability of treatment weight and inverse probability on censoring weight. Stratification on time.                                                                           |
| Mattana     | 1997             | 3                      | 1                       | 1                 | No                           | Multivariate Cox proportional hazards model.                                  | Prevalent patients. Effect measure not provided. No details for other mortality causes (competing risks).                                                                              |
| Mircescu    | 2006             | 3                      | 1                       | 3                 | Yes                          | Multivariate Cox proportional hazards model.                                  | Retrospective. Low number of events. Adjustment unclear. No stratification on time, stratification on age. Censoring at transplantation.                                               |
| Mircescu    | 2014             | 4                      | 1                       | 3                 | No                           | Multivariate Cox proportional hazards model.                                  | Stratification on age. No adjustment on comorbidities.                                                                                                                                 |
| Sanabria    | 2008             | 3                      | 2                       | 1                 | Yes                          | Multivariate Cox proportional hazards model.                                  | Retrospective. No stratification on time, stratification on age. Censoring at transplantation.                                                                                         |

Continued



Table 2. Continued

| Author              | Publication year | Newcastle–Ottawa scale |                         |                   | Potential financial interest | Methods                                      | Comments                                                                                                              |
|---------------------|------------------|------------------------|-------------------------|-------------------|------------------------------|----------------------------------------------|-----------------------------------------------------------------------------------------------------------------------|
|                     |                  | Selection (up to 4)    | Comparability (up to 2) | Outcome (up to 3) |                              |                                              |                                                                                                                       |
| Stack               | 2003             | 4                      | 2                       | 3                 | No                           | Time-dependant Cox regression.               | Stratification on time and congestive heart failure. Additional as-treat analysis.                                    |
| Termorshuizen       | 2003             | 4                      | 1                       | 2                 | Unclear                      | Multivariate Cox proportional hazards model. | Stratification on time and age. Additional as-treat analysis. Censoring at transplantation. Low number of patients    |
| van de Luijtgaarden | 2011             | 4                      | 2                       | 2                 | Yes                          | Multivariate Cox proportional hazards model. | Propensity score. Censoring at transplantation. No stratification on time, stratification on age and gender.          |
| Vonesh              | 2004             | 4                      | 2                       | 3                 | Yes                          | Multivariate Poisson regression              | Additional as-treat analysis. Censoring at transplantation. Stratification on age, comorbidities.                     |
| Weinhandl           | 2010             | 4                      | 2                       | 3                 | Yes                          | Multivariate Cox proportional hazards model. | Propensity score. Additional as-treat analysis. Censoring at transplantation. Stratification on age, comorbidities.   |
| Winkelmayer         | 2002             | 3                      | 2                       | 3                 | Yes                          | Multivariate Cox proportional hazards model. | Propensity score. Stratification on time. No quantitative results for diabetic patients. Censoring at transplantation |
| Yeates              | 2012             | 4                      | 2                       | 3                 | Yes                          | Multivariate Poisson regression              | Additional as-treat analysis. Stratification on age, gender and vintage.                                              |

years [21], during the first year [34]. In patients aged over 44 years, Yeates *et al.* [24] showed a higher risk of death in diabetic patients on PD. Stack *et al.* [40] reported adjusted mortality to be higher for PD patients with CHF who remained on this therapy during the follow-up and for patients who switched compared with those who remained on HD. In the subgroup without CHF, the mortality was similar for patients who remained either on HD or PD but was higher for those who switched.

In the USRDS cohort that also included prevalent patients, PD was associated with higher mortality [16]. In another USRDS cohort, diabetic patients appeared to suffer from a substantially higher cerebrovascular death rate on PD versus HD with advancing age [17]. Of note, this study did not provide details on other mortality causes (competing risks).

#### Dialysis modality and infectious complications

In one small cohort study, higher infection rates (hospitalization or access-related infections) were observed in diabetic PD patients (1.28 versus 0.84/year,  $P < 0.004$ ) but this difference lost its statistical significance after adjustment for albumin, age, race and gender (RR 1.13; 95% CI 0.76–1.67) [31].

## DISCUSSION

When considering patient survival, in presence of conflicting results, we found no evidence-based arguments in favour or against a particular dialysis modality as first treatment in patients with diabetes and ESKD. According to subgroup

analyses, some concerns may arise about choosing PD for elderly and frail patients since this technique was associated with a higher risk of death, particularly in the mid-short term.

Differences between studies can be explained by differences in PD and HD practices, and can thus be country or centre-specific. Mehrotra *et al.* [41], using the database of five large US dialysis providers, found that the propensity to start PD in a certain chain substantially influenced relative mortality risk in PD versus HD patients. Most studies compared all PD techniques with all HD modalities, blurring the interpretation of results for those separate techniques. The higher mortality on PD versus HD reported in the Australia and New Zealand Dialysis and Transplant (ANZDATA) cohort, for example, disappeared when home HD patients are excluded [42]. It has been well demonstrated that, in peritoneal dialysis, applying short dwells results in better survival in fast transporting patients, whereas long dwells result in better survival in slow transporting patients [43, 44]. Neglecting this type of (subtle) nuances in treatment practice might severely impact on the final interpretation of the data.

Unfortunately, most of the studies based on registry data did not take into account the renal function at dialysis start. The better survival associated with PD in the initial phase seen in some studies could be explained by a higher residual renal function in those patients who started earlier than their counterparts on HD, as observed in many registries [45, 46]. Early starters have an artificial survival advantage, since at baseline they are earlier in the course of their disease than late starters; this bias is usually referred to as ‘lead-time bias’.

Another possible explanation of contradictory results may be due to the vascular access used in HD patients in the various countries. In fact, some studies have shown important influence of HD vascular access type on survival comparisons between incident HD and PD patients [47, 48]. In a study including 40 526 incident adult dialysis patients from the Canadian Organ Replacement Register between 2001 and 2008, patients starting HD using a central venous catheter had a higher risk of death in the first year compared with those who started PD (adjusted HR, 1.8; 95% CI, 1.6–1.9), whereas there was no difference in survival between HD patients with arteriovenous fistula or graft and PD patients (adjusted HR, 0.9; 95% CI, 0.8–1.1) [47]. In a study including 152 patients in Portugal, the number of infection-free patients in two groups either PD or HD with tunnelled cuffed catheter was, respectively, 57 and 65% after 1 year of follow-up; both catheter-related bacteraemia and hospital admissions were significantly higher in the HD-tunnelled cuffed catheter group. Only one study analysed the association of dialysis modality and infection in diabetic patients [31]. Mainly because of lack of power, this study was inconclusive. In an ANZDATA cohort, PD was consistently associated with increased hazard of death from infection compared with HD after 6 months of treatment using a competing risks approach [49]. This increased risk of infectious death in PD patients was largely accounted for by an increased risk of death caused by bacterial or fungal peritonitis. Unfortunately, no subgroup analyses were performed in diabetic patients. In addition to the direct effects of central venous catheter use on morbidity and mortality, initiation of HD with a central venous catheter is a proxy for comorbid patient characteristics that are associated with reduced survival among dialysis patients. In diabetic patients, the difficulty to create a fistula due to advanced calcific atherosclerosis in peripheral vessels reflects probably also the poor vascular condition of vital organs. Also, emergency dialysis start is an additional risk factor associated to HD with a catheter. When PD was compared with unplanned HD, the risk of death at 2 years tended to be higher in elderly French patients starting dialysis after 75 years (HR: 1.3, 95% CI: 0.9–1.7) [33].

Discrepant results between studies may be due to the period of observation. One may argue that practice concerning adequate dialysis or timing of dialysis initiation may have changed over time and may have an impact on the relative benefit from one modality over another. A Danish study showed an overall benefit for PD in diabetic patients in the cohort 2000–2010 (HR 0.85, 95% CI 0.75–0.97) which is mainly due to the initial period of 6 months: HR 0.48 (95% CI 0.32–0.73). After 6 months, no statistical difference between the two modalities was observed [23]. In the cohort 1990–1999, survival was better on PD for the first 6 months (HR 0.34, 95% CI 0.2–0.56) but was better on HD after 48 months (HR 1.52, 95% CI 1.08–2.12). We found no association between the year of publication and the conclusions drawn from the included studies.

There might be differences in the outcomes between PD and HD based on variation in regional practices, and also over with changing practices over time. Whereas formal analysis of this aspect is difficult, it has been suggested that countries with higher PD prevalence tend to have better outcomes [7, 19, 21, 23, 25].

Because of the numerous methodological pitfalls in observational studies comparing PD and HD, utmost caution is required in the interpretation of results, as in all studies, selection bias may not be set aside.

First, the methodology of data management has an influence. In 13 studies, patients were included only if they had survived at least 90 days [18–20, 25–27, 29, 30, 32, 35–38]. As mortality risk is much higher in HD patients in the first 3 months, studies including prevalent patients, or including only patients who survived the first 90 days, have a selection bias in favour of HD (survival of the fittest bias). In a matched pair cohort study, Weinhandel *et al.* [34] demonstrated that PD was associated with improved survival when analysis included all patients from Day 0, but not if patients were only included after 90 days.

Second, differences in patient mix (age, gender, diabetes, cardiovascular disease, dropout rate for transplantation) of the cohorts may influence outcome. With the exception of three studies [26, 32, 33], PD patients were younger and had less comorbidity. All studies used adjustment on case-mix to overcome indication bias due to the fact that treatment was not allocated in a randomized way. The confounders included in the multivariate analysis were highly variable among studies and one cannot exclude residual confounding. Five used a propensity score [8, 20, 28, 34, 35]. One study used a marginal structural model with an inverse probability of treatment weighting [38] to balance the known treatment-specific covariate distributions, a new approach for causal inference from observational data. This technique, however, still does not balance unknown confounders. None used an instrumental variable. Third, the type of performed statistical analyses could influence the results, as most patients transfer between modalities, and censoring may be informative [50]. Since most techniques are based on the hypothesis of a non-informative censoring at transplantation, this may result in overestimation of the cumulative risk of death. Seven intention-to-treat studies considered all deaths after the start of renal replacement therapy, regardless whether they occurred during dialysis or transplantation [21, 24, 29, 30, 33, 35, 36]. In fourteen other studies, patients were censored at the time of renal transplantation [7, 18–20, 22, 23, 25–28, 30, 37, 38], but only one study used an inverse probability of censoring weighting [38] to address informative censoring. In the technique of inverse probability of censoring weighting patients are weighted by the inverse of their probability of getting a transplant and this taking into account their specific covariates. None used transplantation as time-dependent variable to take into account a risk factor that is not present at start. None used competing risks analysis [51, 52] to estimate the survival probability in both groups as death during dialysis can only be observed if patients are not transplanted. However, the Cox model used in the majority of the studies allows to estimate the hazard ratio in a cause-specific approach [53].

More treatment switches have been observed for PD patients [7, 29, 38]. Therefore, the way those switches are analysed may result in selection bias. All studies used an intention-to-treat analysis. Some of them also performed additional analysis: as-treated [7, 21, 25, 27–30], censoring at switch [7, 18, 22, 28] or switch considered as treatment failure [21, 28].



Last, all studies performed numerous subgroup analyses which may result in low power and the risk of introducing selection bias. One has to find a good balance between taking into account details of differences between different variations of both haemodialysis and peritoneal dialysis, and still preserving sufficient statistical power. Careful planning of studies with *a priori* specification and power calculation of analyses to be performed should be recommended. Because of non-proportional hazards, with only one exception [18], all studies stratified their analysis: on time and age [19, 20, 22, 25], time and some comorbidities [29, 30], time alone [28], age alone [7, 21, 26, 32, 33], age and gender [8], age and comorbidities [27, 34].

In the absence of data concerning comparison of HD and PD in terms of quality of life in diabetic ESKD patients, it was not possible to explore this critically important outcome. Although diabetics have a lower quality of life than non-diabetic dialysis patients [54, 55], the influence of dialysis modality needs further exploration. Four systematic reviews on this topic, including ESKD patients with or without diabetes, did not find statistically significant differences in quality of life (QOL) or utility [55–58] between PD and HD patients even if PD patients tend to rate their quality of life higher than HD patients. Yet, HD patients may enjoy a relatively better QOL in the physical dimensions over time [56]. Mental health components are comparable between both dialysis populations. However, there is evidence that free modality choice is associated with more satisfaction of patients with their overall care (Van Biesen *et al.*, NDT, CEAPIR data under submission).

The question of whether peritoneal dialysis or haemodialysis should be the preferred modality to start renal replacement therapy has been posed since the very introduction of PD. Only one randomized controlled trial has been published, showing no difference in 3-year mortality [6]. This study was hampered by recruitment problems and, despite many efforts, only included 38 patients, probably pointing out that patients do not want to be randomized to a modality, but prefer to make their own choice.

Our review has some strengths and limitations that deserve mentioning. Strengths include a systematic search of medical databases, data extraction, analysis and study quality assessment by two independent reviewers. In contrast, this review is limited by the quality and the number of data available to address the question of modality selection in diabetic patients. Except mortality, no other outcomes have been addressed by large cohorts. Accordingly, a previous meta-analysis of outcome studies in ESKD patients was also unable to resolve the question of whether PD and HD provide equivalent outcomes because of the heterogeneity of the studies [59]. Due to the nature of our search question, our study was not intended to answer other important questions such as the place of transplantation, or of conservative care. Our conclusions consequently apply only to patients who, in view of their expected life expectancy [60, 61], decided to start renal replacement therapy, and have no access to a pre-emptive transplantation.

In conclusion, the available evidence derived from observational studies is inconsistent. Therefore evidence-based arguments indicating that HD or PD as first treatment may improve patient-centred outcomes in diabetics with ESKD are

lacking. In the absence of such evidence modality selection should be governed by patient preference, after unbiased patient information.

## SUPPLEMENTARY DATA

Supplementary data are available online at <http://ndt.oxfordjournals.org>.

## ACKNOWLEDGEMENT

The ERBP Diabetes Guideline Development Group consists of (alphabetical order): Henk Bilo, Davide Bolignano, Louis Coentrao, Cecile Couchoud, Adrian Covic, Christiane Drechsler, Johan De Sutter, David Goldsmith, Luigi Gnudi, James Heaf, Olle Heimburger, Kitty Jager, Hakan Nacak, Ionut Nistor, Maria Soler, Charlie Tomson, Wim Van Biesen, Liesbeth Vanhuffel, Steven Van Laecke, Laurent Weekers, Andrzej Wiecek. All members of the group have read the paper and contributed corrections and suggestions.

## DISCLAIMER

The present text is based upon the information available to the guideline development group at the time of the preparation of this publication. It has been designed to provide information and assist decision-making, but is not intended to define a standard of care or to improve an exclusive course of diagnosis, prevention or treatment. Variations in practice are inevitable when physicians take into account individual patient needs, available resources and limitations specific for a geographic area, country, institution or type of practice. In addition, evidence may change over time as new information becomes available, so that practice may be modified subsequently. Every practitioner using this text is responsible for its application to any particular clinical situation. The work group members involved in the development of the present text have disclosed all actual and potential conflicts of interest that may arise as a result of an outside relationship or a personal, professional, or business interest at the website of ERBP ([www.european-renal-best-practice.org](http://www.european-renal-best-practice.org)).

## CONFLICT OF INTEREST STATEMENT

None declared.

(See related article by Combe *et al.* Evidence-based choice of dialysis technique in diabetics with end-stage kidney disease: half a loaf is better than no bread. *Nephrol Dial Transplant* 2015; 30: 160–162.)

## REFERENCES

- Kramer A, Stel V, Zoccali C *et al.* An update on renal replacement therapy in Europe: ERA-EDTA Registry data from 1997 to 2006. *Nephrol Dial Transplant* 2009; 24: 3557–3566
- Assogba FG, Couchoud C, Hannedouche T *et al.* Trends in the epidemiology and care of diabetes mellitus-related end-stage renal disease in France, 2007–2011. *Diabetologia* 2014; 57: 718–728
- Biesenbach G, Pohanka E. Dialysis in diabetic patients: hemodialysis and peritoneal dialysis. Pros and cons. *Minerva Urol Nefrol* 2012; 64: 173–182
- Locatelli F, Pozzoni P, Del VL. Renal replacement therapy in patients with diabetes and end-stage renal disease. *J Am Soc Nephrol* 2004; 15(Suppl 1): S25–S29
- Van LS, Veys N, Verbeke F *et al.* The fate of older diabetic patients on peritoneal dialysis: myths and mysteries and suggestions for further research. *Perit Dial Int* 2007; 27: 611–618
- Korevaar JC, Feith GW, Dekker FW *et al.* Effect of starting with hemodialysis compared with peritoneal dialysis in patients new on dialysis treatment: a randomized controlled trial. *Kidney Int* 2003; 64: 2222–2228
- Heaf JG, Lokkegaard H, Madsen M. Initial survival advantage of peritoneal dialysis relative to haemodialysis. *Nephrol Dial Transplant* 2002; 17: 112–117
- van de Luitgaarden MW, Noordzij M, Stel VS *et al.* Effects of comorbid and demographic factors on dialysis modality choice and related patient survival in Europe. *Nephrol Dial Transplant* 2011; 26: 2940–2947
- Vonesh EF, Snyder JJ, Foley RN *et al.* Mortality studies comparing peritoneal dialysis and hemodialysis: what do they tell us? *Kidney Int Suppl* 2006; S3–S11
- Couchoud C, Savoye E, Frimat L *et al.* Variability in case mix and peritoneal dialysis selection in fifty-nine French districts. *Perit Dial Int* 2008; 28: 509–517
- Thamer M, Hwang W, Fink NE *et al.* U.S. nephrologists' attitudes towards renal transplantation: results from a national survey. *Transplantation* 2001; 71: 281–288
- Jung B, Blake PG, Mehta RL *et al.* Attitudes of Canadian nephrologists toward dialysis modality selection. *Perit Dial Int* 1999; 19: 263–268
- Jassal SV, Krishna G, Mallick NP *et al.* Attitudes of British Isles nephrologists towards dialysis modality selection: a questionnaire study. *Nephrol Dial Transplant* 2002; 17: 474–477
- Mendelssohn DC, Mullaney SR, Jung B *et al.* What do American nephrologists think about dialysis modality selection? *Am J Kidney Dis* 2001; 37: 22–29
- Wells G, Shea B, O'Connell D *et al.* The Newcastle-Ottawa Scale (NOS) for assessing the quality of nonrandomised studies in meta-analyses. [http://www.ohri.ca/programs/clinical\\_epidemiology/oxford.asp](http://www.ohri.ca/programs/clinical_epidemiology/oxford.asp). 2014.
- Bloembergen WE, Port FK, Mauger EA *et al.* A comparison of mortality between patients treated with hemodialysis and peritoneal dialysis. *J Am Soc Nephrol* 1995; 6: 177–183
- Mattana J, Effiong C, Gooneratne R *et al.* Risk of fatal cerebrovascular accident in patients on peritoneal dialysis versus hemodialysis. *J Am Soc Nephrol* 1997; 8: 1342–1347
- Lee CC, Sun CY, Wu MS. Long-term modality-related mortality analysis in incident dialysis patients. *Perit Dial Int* 2009; 29: 182–190
- Liem YS, Wong JB, Hunink MG *et al.* Comparison of hemodialysis and peritoneal dialysis survival in The Netherlands. *Kidney Int* 2007; 71: 153–158
- Winkelmayer WC, Glynn RJ, Mittleman MA *et al.* Comparing mortality of elderly patients on hemodialysis versus peritoneal dialysis: a propensity score approach. *J Am Soc Nephrol* 2002; 13: 2353–2362
- Fenton SS, Schaubel DE, Desmeules M *et al.* Hemodialysis versus peritoneal dialysis: a comparison of adjusted mortality rates. *Am J Kidney Dis* 1997; 30: 334–342
- Collins AJ, Weinhandl E, Snyder JJ *et al.* Comparison and survival of hemodialysis and peritoneal dialysis in the elderly. *Semin Dial* 2002; 15: 98–102
- Heaf JG, Wehberg S. Relative survival of peritoneal dialysis and haemodialysis patients: effect of cohort and mode of dialysis initiation. *PLoS One* 2014; 9: e90119
- Yeates K, Zhu N, Vonesh E *et al.* Hemodialysis and peritoneal dialysis are associated with similar outcomes for end-stage renal disease treatment in Canada. *Nephrol Dial Transplant* 2012; 27: 3568–3575
- Termorshuizen F, Korevaar JC, Dekker FW *et al.* Hemodialysis and peritoneal dialysis: comparison of adjusted mortality rates according to the duration of dialysis: analysis of The Netherlands Cooperative Study on the Adequacy of Dialysis 2. *J Am Soc Nephrol* 2003; 14: 2851–2860
- Mircescu G, Garneata L, Florea L *et al.* The success story of peritoneal dialysis in Romania: analysis of differences in mortality by dialysis modality and influence of risk factors in a national cohort. *Perit Dial Int* 2006; 26: 266–275
- Vonesh EF, Snyder JJ, Foley RN *et al.* The differential impact of risk factors on mortality in hemodialysis and peritoneal dialysis. *Kidney Int* 2004; 66: 2389–2401
- Jaar BG, Coresh J, Plantinga LC *et al.* Comparing the risk for death with peritoneal dialysis and hemodialysis in a national cohort of patients with chronic kidney disease. *Ann Intern Med* 2005; 143: 174–183
- Stack AG, Molony DA, Rahman NS *et al.* Impact of dialysis modality on survival of new ESRD patients with congestive heart failure in the United States. *Kidney Int* 2003; 64: 1071–1079
- Ganesh SK, Hulbert-Shearon T, Port FK *et al.* Mortality differences by dialysis modality among incident ESRD patients with and without coronary artery disease. *J Am Soc Nephrol* 2003; 14: 415–424
- Aslam N, Bernardini J, Fried L *et al.* Comparison of infectious complications between incident hemodialysis and peritoneal dialysis patients. *Clin J Am Soc Nephrol* 2006; 1: 1226–1233
- Sanabria M, Munoz J, Trillos C *et al.* Dialysis outcomes in Colombia (DOC) study: a comparison of patient survival on peritoneal dialysis vs hemodialysis in Colombia. *Kidney Int Suppl* 2008; S165–S172
- Couchoud C, Moranne O, Frimat L *et al.* Associations between comorbidities, treatment choice and outcome in the elderly with end-stage renal disease. *Nephrol Dial Transplant* 2007; 22: 3246–3254
- Weinhandl ED, Foley RN, Gilbertson DT *et al.* Propensity-matched mortality comparison of incident hemodialysis and peritoneal dialysis patients. *J Am Soc Nephrol* 2010; 21: 499–506
- Choi JY, Jang HM, Park J *et al.* Survival advantage of peritoneal dialysis relative to hemodialysis in the early period of incident dialysis patients: a nationwide prospective propensity-matched study in Korea. *PLoS One* 2013; 8: e84257
- Mircescu G, Stefan G, Garneata L *et al.* Outcomes of dialytic modalities in a large incident registry cohort from Eastern Europe: the Romanian Renal Registry. *Int Urol Nephrol* 2014; 46: 443–451
- Chang JH, Sung JY, Ahn SY *et al.* Hemodialysis leads to better survival in patients with diabetes or high comorbidity, compared to peritoneal dialysis. *Tohoku J Exp Med* 2013; 229: 271–277
- Lukowsky LR, Mehrotra R, Kheifets L *et al.* Comparing mortality of peritoneal and hemodialysis patients in the first 2 years of dialysis therapy: a marginal structural model analysis. *Clin J Am Soc Nephrol* 2013; 8: 619–628
- Chang TI, Li S, Chen SC *et al.* Risk factors for ESRD in individuals with preserved estimated GFR with and without albuminuria: results from the Kidney Early Evaluation Program (KEEP). *Am J Kidney Dis* 2013; 61: S4–11
- Stack AG, Murthy BV, Molony DA. Survival differences between peritoneal dialysis and hemodialysis among 'large' ESRD patients in the United States. *Kidney Int* 2004; 65: 2398–2408
- Mehrotra R, Khawar O, Duong U *et al.* Ownership patterns of dialysis units and peritoneal dialysis in the United States: utilization and outcomes. *Am J Kidney Dis* 2009; 54: 289–298
- Marshall MR, Hawley CM, Kerr PG *et al.* Home hemodialysis and mortality risk in Australian and New Zealand populations. *Am J Kidney Dis* 2011; 58: 782–793
- Johnson DW, Hawley CM, McDonald SP *et al.* Superior survival of high transporters treated with automated versus continuous ambulatory peritoneal dialysis. *Nephrol Dial Transplant* 2010; 25: 1973–1979
- Van BW, Heimbürger O, Krediet R *et al.* Evaluation of peritoneal membrane characteristics: clinical advice for prescription management by the ERBP working group. *Nephrol Dial Transplant* 2010; 25: 2052–2062

45. Lassalle M, Labeeuw M, Frimat L *et al.* Age and comorbidity may explain the paradoxical association of an early dialysis start with poor survival. *Kidney Int* 2010; 77: 700–707
46. Wright S, Klausner D, Baird B *et al.* Timing of dialysis initiation and survival in ESRD. *Clin J Am Soc Nephrol* 2010; 5: 1828–1835
47. Perl J, Wald R, McFarlane P *et al.* Hemodialysis vascular access modifies the association between dialysis modality and survival. *J Am Soc Nephrol* 2011; 22: 1113–1121
48. Coentrao L, Santos-Araujo C, Dias C *et al.* Effects of starting hemodialysis with an arteriovenous fistula or central venous catheter compared with peritoneal dialysis: a retrospective cohort study. *BMC Nephrol* 2012; 13: 88
49. Johnson DW, Dent H, Hawley CM *et al.* Associations of dialysis modality and infectious mortality in incident dialysis patients in Australia and New Zealand. *Am J Kidney Dis* 2009; 53: 290–297
50. Van BW, Vanholder R, Debaquer D *et al.* Comparison of survival on CAPD and haemodialysis: statistical pitfalls. *Nephrol Dial Transplant* 2000; 15: 307–311
51. Bechade C, Guittet L, Evans D *et al.* Early failure in patients starting peritoneal dialysis: a competing risks approach. *Nephrol Dial Transplant* 2014; 29: 2127–2135
52. Teixeira L, Rodrigues A, Carvalho MJ *et al.* Modelling competing risks in nephrology research: an example in peritoneal dialysis. *BMC Nephrol* 2013; 14: 110
53. Noordzij M, Leffondre K, van Stralen KJ *et al.* When do we need competing risks methods for survival analysis in nephrology? *Nephrol Dial Transplant* 2013; 28: 2670–2677
54. Osthus TB, von der LN, Ribu L *et al.* Health-related quality of life and all-cause mortality in patients with diabetes on dialysis. *BMC Nephrol* 2012; 13: 78
55. Wyld M, Morton RL, Hayen A *et al.* A systematic review and meta-analysis of utility-based quality of life in chronic kidney disease treatments. *PLoS Med* 2012; 9: e1001307
56. Boateng EA, East L. The impact of dialysis modality on quality of life: a systematic review. *J Ren Care* 2011; 37: 190–200
57. Liem YS, Bosch JL, Hunink MG. Preference-based quality of life of patients on renal replacement therapy: a systematic review and meta-analysis. *Value Health* 2008; 11: 733–741
58. Liem YS, Bosch JL, Arends LR *et al.* Quality of life assessed with the Medical Outcomes Study Short Form 36-Item Health Survey of patients on renal replacement therapy: a systematic review and meta-analysis. *Value Health* 2007; 10: 390–397
59. Ross S, Dong E, Gordon M *et al.* Meta-analysis of outcome studies in end-stage renal disease. *Kidney Int* 2000; 57: S-28-S-38
60. Van Biesen W, Vanholder RC, Veys N *et al.* An evaluation of an integrative care approach for end-stage renal disease patients. *J Am Soc Nephrol* 2000; 11: 116–125
61. Couchoud C, Dantony E, Elsensohn MH *et al.* Modelling treatment trajectories to optimize the organization of renal replacement therapy and public health decision-making. *Nephrol Dial Transplant* 2013; 28: 2372–2382

Received for publication: 1.7.2014; Accepted in revised form: 8.8.2014
